# Supplementary material
Source: HighWire-hosted journal article supplement (https://hw-f5-jim.highwire.org/content/69/1/13)
Supplement: inline-supplementary-material-1 [file inline-supplementary-material-1.pdf]

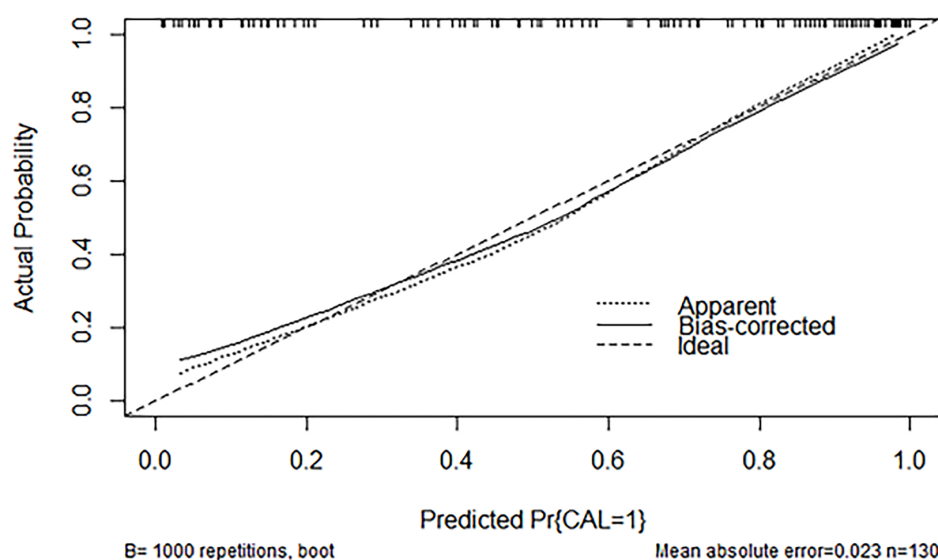

Supplementary\_Figure\_1 Calibration curve. The 45° line in the plot indicates a perfect calibration that the predictive capability of the model perfectly matches the actual risk of KD with CALs. The dotted line represents the performance of the nomogram, whilst the solid line corrects for any bias in the nomogram.
