# Supplementary material
Source: HighWire-hosted journal article supplement (https://hw-f5-jim.highwire.org/content/69/1/13)
Supplement: inline-supplementary-material-3 [file inline-supplementary-material-3.pdf]

#### Availability of data and materials

The data that support the findings of this study are available from Lanzhou University Second Hospital but restrictions apply to the availability of these data, which were used under license for the current study, and so are not publicly available. This data mainly includes clinical records. Data are however available from the authors upon reasonable request and with permission of Lanzhou University Second Hospital.

E-mail: ldyangyn@163.com
